# Supplementary material
Source: PubMed Central journal article supplement (PMC5339846)
Supplement: cr2016141x1.pdf [file cr2016141x1.pdf]

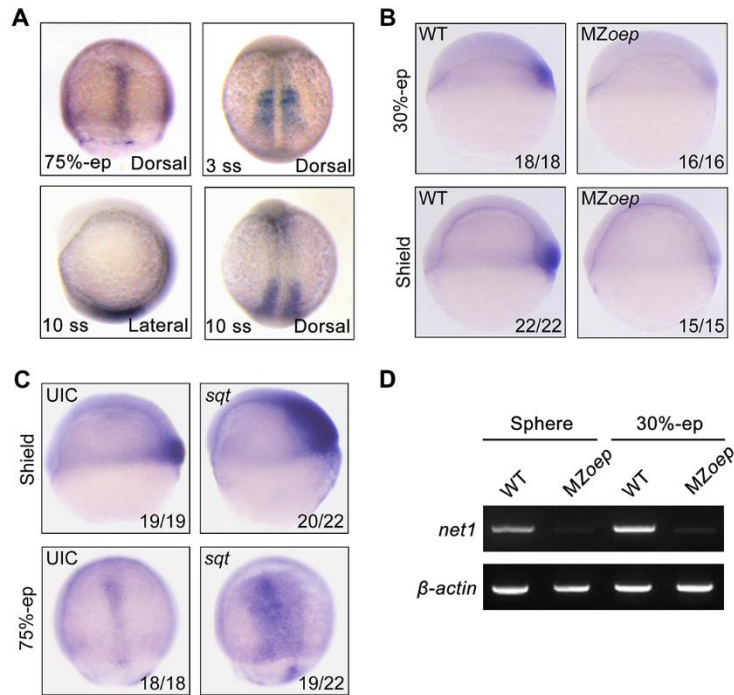

**Figure S1** The expression of *net1* at the dorsal blastoderm margin is regulated by Nodal signal. (A) Expression pattern of zebrafish *net1* at indicated stages, detected by *in situ* hybridization. Embryos at 75%-epiboly stage and 3 somite stage were shown in dorsal views with anterior side at the top. (B-C) *In situ* hybridization reveals the expression of *net1* in wild-type embryos, MZoep mutants and 2 pg *sqt* mRNA injected embryos at indicated stages. WT, wild-type; UIC, uninjected control. (D) Semi-quantitative RT-PCR analysis of the *net1* transcript profile in wild-type and MZoep mutant embryos at sphere and 30% epiboly stages. The expression of  $\beta$ -actin was examined as an internal control.
