# Supplementary material
Source: PubMed Central journal article supplement (PMC5339846)
Supplement: cr2016141x2.pdf [file cr2016141x2.pdf]

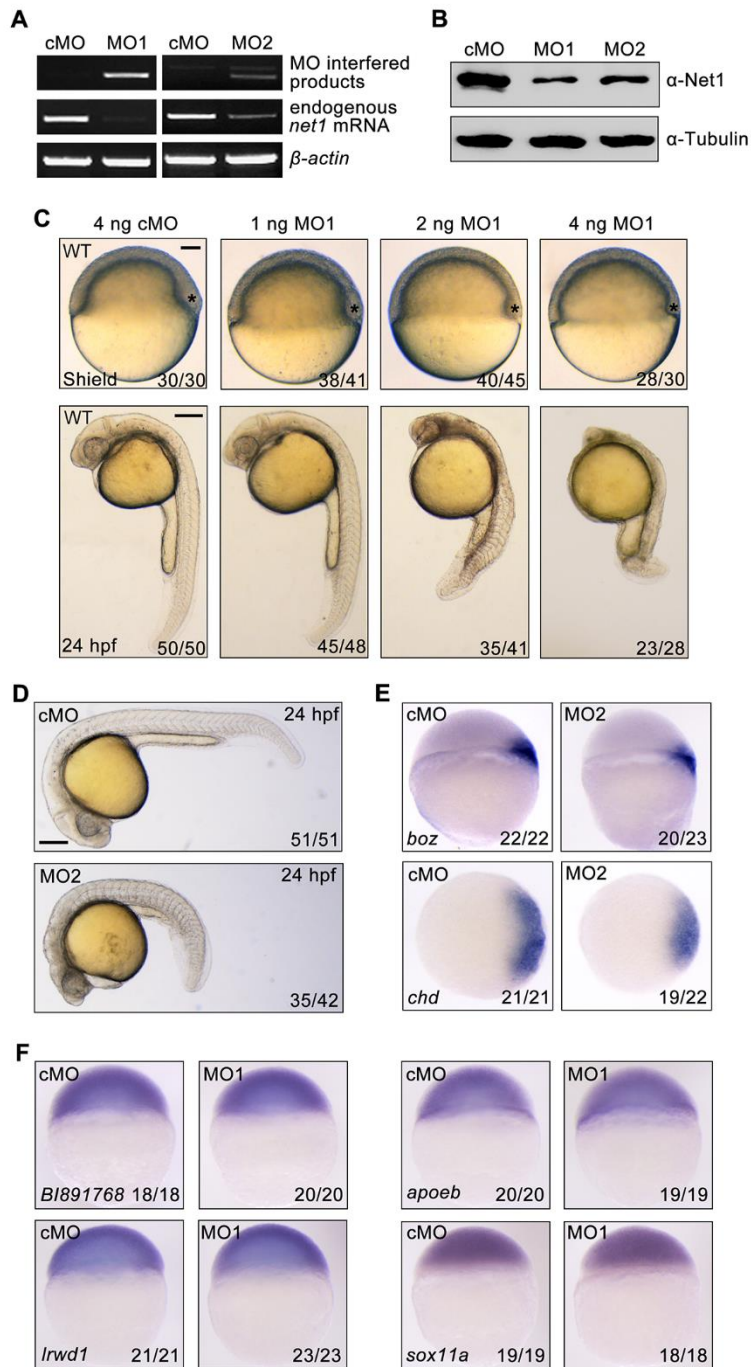

**Figure S2** Knockdown of *net1* by MO injection blocks zebrafish dorsal axis formation. (A and B) Efficiency of *net1* MO1 and MO2 in knocking down endogenous *net1* expression. Embryos were injected with 4 ng *net1* cMO, 4 ng *net1* MO1 (targeting the splicing region between exon2 and intron2), 4 ng *net1* MO2 (targeting the splicing region between exon3 and intron3), respectively. All embryos were harvested at 30%-epiboly stage for semi-quantitative

RT-PCR (A) or western blot analysis (B). Note that the specific splice interference MO mRNA products are only detected in morphants. (C) Morphological defects in *net1* MO1 injected embryos at shield stage (upper panels: lateral views with dorsal to the right; scale bar, 100  $\mu$ m) and 24 hpf (lower panels: lateral views with anterior to the top; scale bar, 200  $\mu$ m). Note that the dorsal organizer becomes smaller in *net1* MO1 injected embryos (black star). The ratios of affected embryos are indicated. (D) Morphological defects in *net1* MO2-injected embryos. Images of embryos injected with 4 ng *net1* cMO or MO2 were acquired at 24 hpf. All embryos are shown in lateral views with the anterior side at the left. Scale bar, 200  $\mu$ m. (E) Expression of dorsal marker genes in *net1* morphants. Embryos were injected with 4 ng *net1* cMO or MO2 at one cell stage and harvested for *in situ* hybridization at sphere stage. (F) The expression of indicated early zygotic genes at sphere stage in the embryos injected with 4 ng cMO or 4 ng *net1* MO1.
