# Supplementary material
Source: PubMed Central journal article supplement (PMC5339846)
Supplement: cr2016141x4.pdf [file cr2016141x4.pdf]

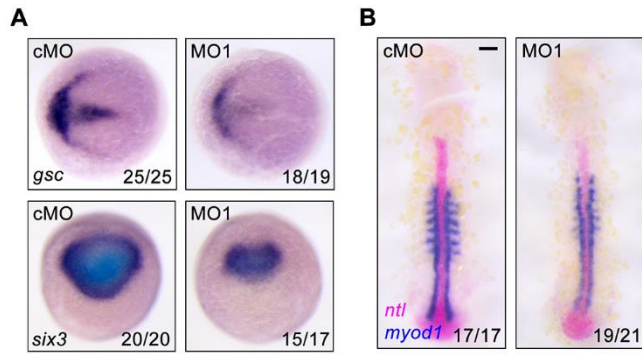

**Figure S4** The dorsal imperfections in *net1* morphants are not resulted from MO injection-induced developmental delay. (A) The expression patterns of prechordal plate marker gene *gsc* (dorsal view with anterior to the left) and forebrain marker gene *six3* (dorsal view with anterior at the top) in *net1* morphants at bud stage. (B) The expression of *ntl* (red) and *myod1* (blue) in six-somite stage embryos injected with cMO or *net1* MO1. Dorsal view, anterior is upward.
