# Supplementary material
Source: PubMed Central journal article supplement (PMC5339846)
Supplement: cr2016141x5.pdf [file cr2016141x5.pdf]

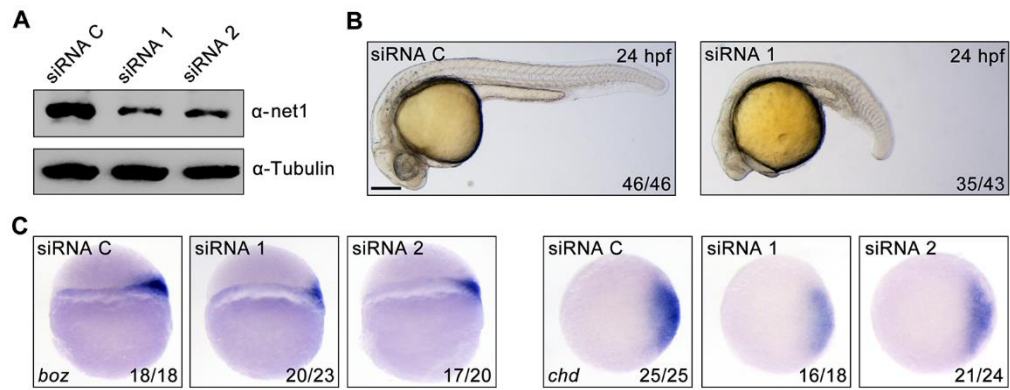

**Figure S5** Knockdown of *net1* by siRNA injection results in severe dorsal development defects. (A) Efficiency of *net1* siRNA knockdown. Embryos were injected with 1 ng of indicated siRNAs at one cell stage and harvested at 30%-epiboly stage for western blot analysis using indicated antibodies. (B) Morphological appearance of embryos injected with indicated siRNAs. Scale bar, 200  $\mu$ m. (C) The expression pattern of *boz* and *chd* was analyzed by *in situ* hybridization in siRNA control (siRNA C), *net1* siRNA 1 and *net1* siRNA 2 injected embryos at sphere stage.
