# Supplementary material
Source: PubMed Central journal article supplement (PMC5339846)
Supplement: cr2016141x6.pdf [file cr2016141x6.pdf]

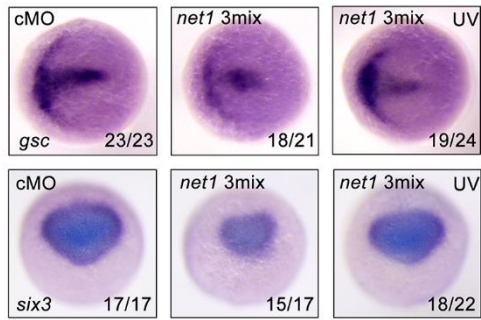

**Figure S6** Overexpression of *net1* rescues the dorsal defects in *net1* morphants. 4 ng *net1* MO1 together with 200 pg *Flag-net1* mRNA and 1 ng AS-Flag-photo-MO (*net1* 3mix) was coinjected into embryos, and a group of *net1* 3mix injected embryos were subjected to UV exposure. The expression of *gsc* and *six3* was examined by *in situ* hybridization at bud stage.
