# Supplementary material
Source: PubMed Central journal article supplement (PMC5339846)
Supplement: cr2016141x7.pdf [file cr2016141x7.pdf]

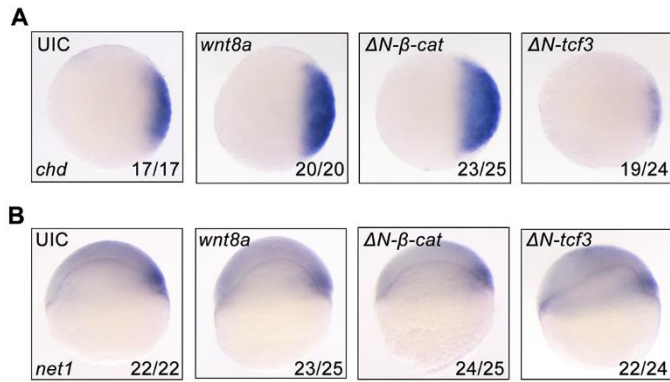

**Figure S7** Zebrafish *net1* expression is not regulated by Wnt/ $\beta$ -catenin signaling. (A) The expression of *chd*, a well-known Wnt/ $\beta$ -catenin signal responsive gene, in sphere stage embryos injected with 10 pg *wnt8a* mRNA, 50 pg  $\Delta N$ - $\beta$ -catenin mRNA and 100 pg  $\Delta N$ -*tcf3* mRNA, respectively. (B) The expression of *net1* in 30%-epiboly stage embryos injected with indicated mRNAs. UIC, uninjected control. Note that the expression of *net1* was not changed by either activation or inhibition of Wnt/ $\beta$ -catenin signaling.
