# Supplementary material
Source: PubMed Central journal article supplement (PMC5339846)
Supplement: cr2016141x9.pdf [file cr2016141x9.pdf]

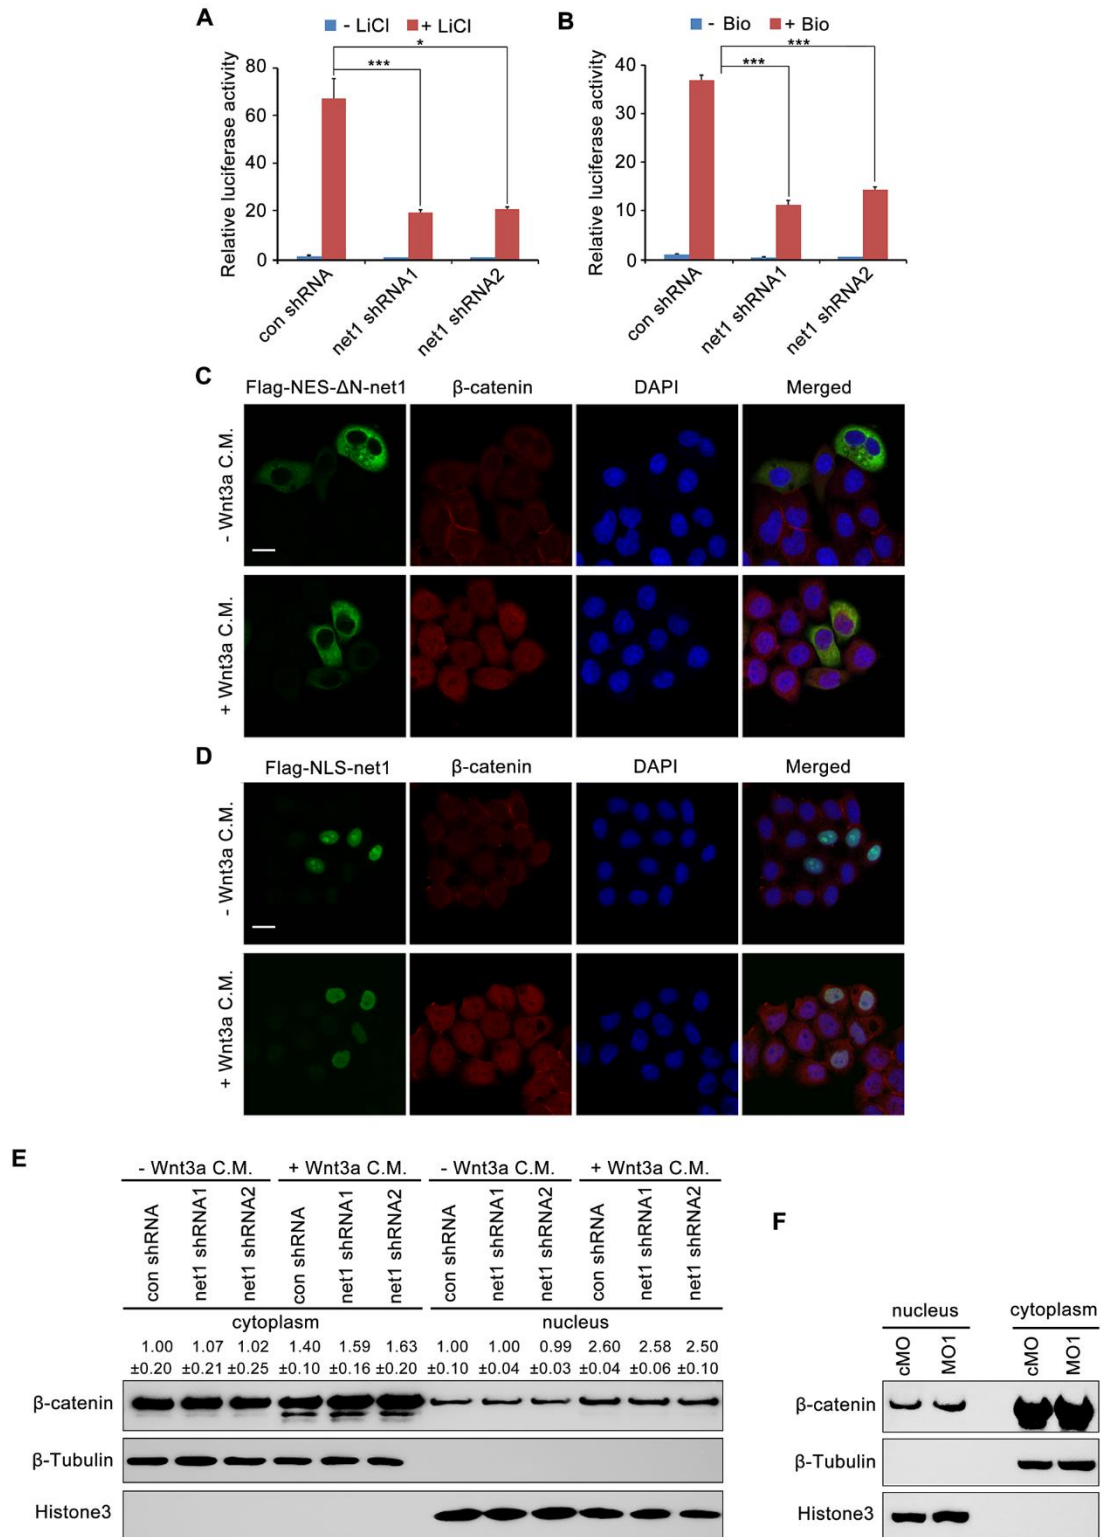

**Figure S9** Net1 functions in parallel with or downstream of  $\beta$ -catenin to regulate canonical Wnt signaling. (A and B) net1 knockdown by transfection of shRNAs significantly decreases LiCl and BIO treatment-induced Wnt/ $\beta$ -catenin activity. HEK293T cells were cotransfected with

super-TOPFlash reporter and the indicated shRNA expression plasmids, then treated with 30 mM LiCl (A) and 10  $\mu$ M BIO (B) for 12 hours before harvesting for luciferase assays. (C and D) Overexpression of net1 does not affect Wnt3a-induced  $\beta$ -catenin nuclear accumulation. HeLa cells were transfected with Flag-NES- $\Delta$ N-Net1 (C) or Flag-NLS-Net1 (D) plasmids for 24 hours, and then treated with or without Wnt3a C.M. for 5 hours before being subjected to immunostaining with anti-Flag (Green) and anti- $\beta$ -catenin (red) antibodies. DAPI was used as a counterstain for cell nuclei (blue). Scale bar, 10  $\mu$ m. (E) Western blots of nuclear or cytosolic fractions from HEK293T cells transfected with the indicated plasmids in the presence or absence of Wnt3a C.M.. Note that the Wnt3a-induced  $\beta$ -catenin nuclear accumulation was not affected in net1-depleted cells. Quantification is the mean relative ratio of cytosolic or nuclear  $\beta$ -catenin signals over  $\beta$ -Tubulin or Histone3 (mean  $\pm$ SD, three independent biological repeats). (F) Western blots of nuclear or cytosolic fractions of all cells from sphere-stage zebrafish embryos injected with the 4 ng cMO or 4 ng *net1* MO1.
