# Supplementary material
Source: PubMed Central journal article supplement (PMC5339846)
Supplement: cr2016141x10.pdf [file cr2016141x10.pdf]

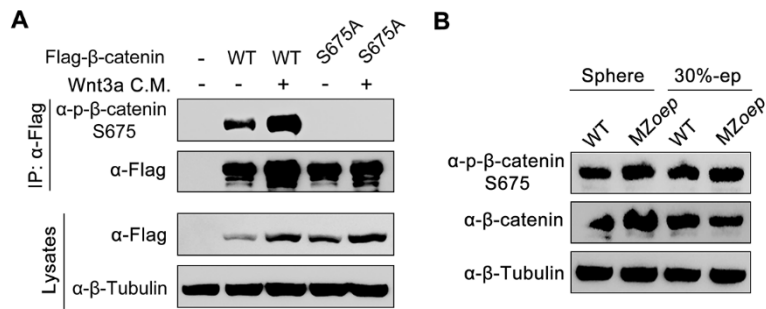

**Figure S10** Nodal signal is dispensable for  $\beta$ -Catenin S675 phosphorylation in zebrafish embryos. (A) The anti-phospho- $\beta$ -Catenin (Ser675) antibody specifically recognizes the S675 phosphorylation of  $\beta$ -Catenin. HEK293T cells transfected with the indicated constructs were treated with or without Wnt3a C.M. for 12 hours before harvesting for immunoprecipitation and western blot analyses. S675A,  $\beta$ -Catenin Ser675A mutant. (B) Western blots for detecting the S675 phosphorylation of  $\beta$ -Catenin in wild-type and *MZoep* mutant embryos at sphere and 30% epiboly stages.
