# Supplementary material
Source: PubMed Central journal article supplement (PMC5339846)
Supplement: cr2016141x12.pdf [file cr2016141x12.pdf]

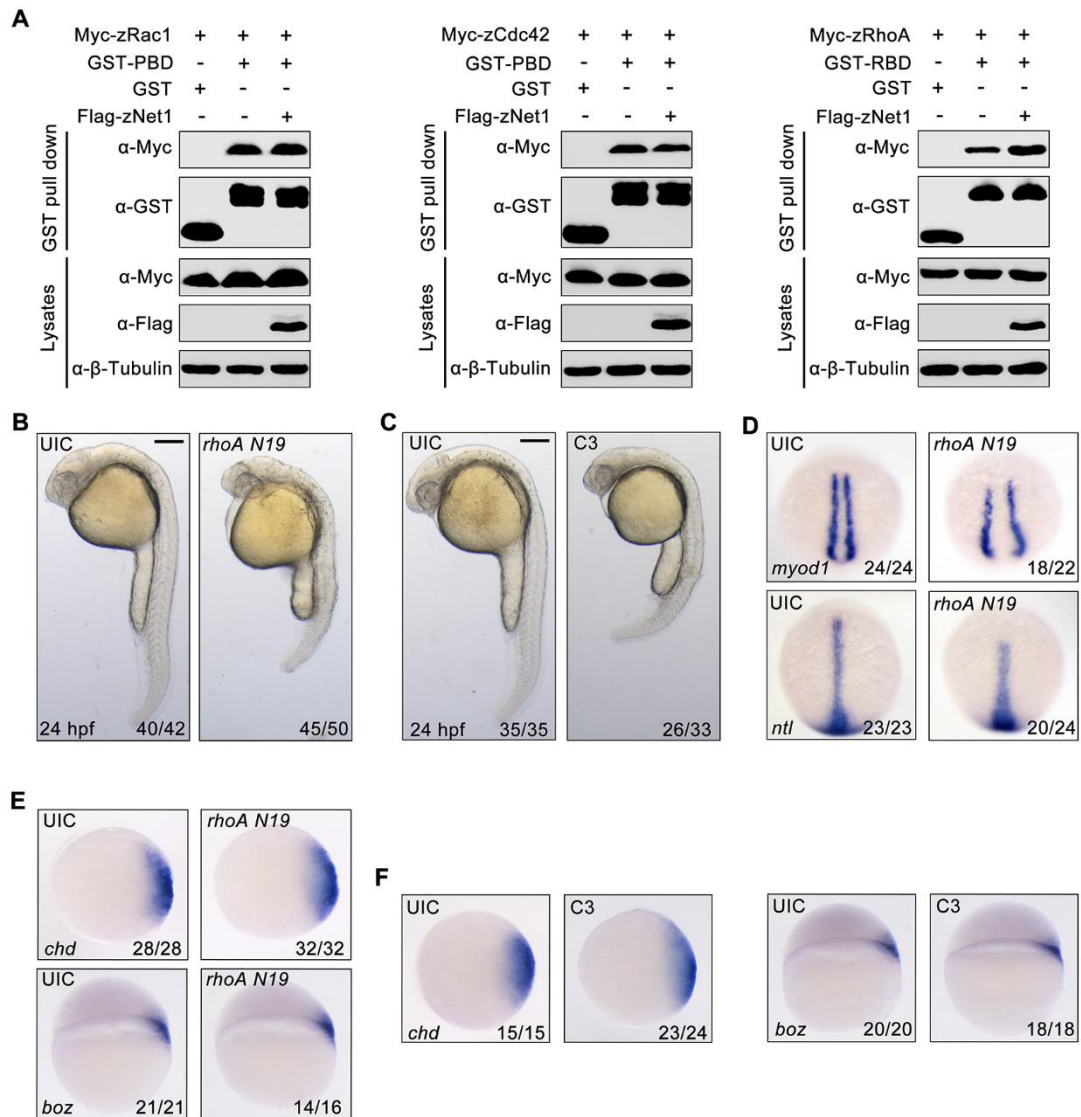

**Figure S12** RhoA is not necessary for dorsal fate specification. (A) Zebrafish Net1 is a specific GEF of RhoA. Embryos were coinjected with 200 pg mRNA of Myc-zRac1 or zCdc42 or zRhoA mRNA together with or without 200 pg Flag-net1 mRNA and 1 ng AS-Flag-photo-MO at one-cell stage, then subjected to UV exposure at 16 cells stage and lysed at sphere stage. The embryos lysates were subjected to GST pull-down experiments with purified GST-PBD or GST-RBD fusion proteins. (B and C) Phenotypes at 24 hpf of embryos injected with 500 pg *rhoA N19* mRNA (B) or 1 nl of 20  $\mu$ M C.botulinum toxin C3 transferase (C). (D) The expression change of *myod1* and *ntl* in bud stage embryos injected with 500 pg *rhoA N19* mRNA. (E and

F) The expression pattern of *boz* and *chd* in sphere stage embryos injected with 500 pg *rhoA* *NI9* mRNA (E) or 1 nl of 20  $\mu$ M C3 transferase (F).
