# Supplementary material
Source: PubMed Central journal article supplement (PMC5339846)
Supplement: cr2016141x14.pdf [file cr2016141x14.pdf]

**Supplemental Information**

**The guanine nucleotide exchange factor net1 facilitates the specification of dorsal cell fates in zebrafish embryos by promoting maternal  $\beta$ -catenin activation**

**Authors:** Shi Wei, Miaomiao Dai, Zhaoting Liu, Yuanqing Ma, Hanqiao Shang, Yu Cao,

Qiang Wang

## Extended Materials and Methods

### *Plasmid constructions and RNA interference*

Wild-type zebrafish *net1* and two *net1* mutants L266E and W437L were cloned into pCS2 vectors for eukaryotic expression. To induce the expression of *net1* in the cytoplasm, we deleted the its N-terminus containing NLS sequences ( $\Delta$ N-*net1*) and added two tandem nuclear export signal (NES) sequences derived from the MAPKK protein [1] to the N terminus of  $\Delta$ N-*net1* (NES- $\Delta$ N-*net1*). Similarly, three tandem NLS sequences derived from the SV40 large T antigen [2] were fused to the N terminus of wild-type *net1* (NLS-*net1*) to facilitate its nuclear expression. Wild-type PAK1, DN-PAK1, CA-PAK1,  $\beta$ -catenin S675D,  $\beta$ -catenin S675A, HDAC1 expression plasmids were kindly gifted from Prof. Wei Wu of Tsinghua University (Beijing, China). For RNA interference in mammalian cells, two human *net1* shRNA constructs were generated using a pLKO.1 plasmid, with the following target sequences: 5'-CCCGAGGTGAACAGGATTTAA-3' and 5'-CCAAAGCTCTTCTTGATCAAA-3'. For RNA interference in zebrafish embryos, two siRNAs targeting different regions of zebrafish *net1* mRNA were designed and synthesized by GenePharma. The sequences of siRNAs were as follows: negative control, sense 5'-ACGUGACACGUUCGGAGAATT-3', antisense 5'-UUCUUCGAACGUGUCACGUTT-3'; *net1* siRNA 1, sense 5'-GCUCACGUUUGGUCAAUATT-3', antisense 5'-UAUUUGACCAAACGUGAGCTT-3'; *net1* siRNA 2, sense 5'-GCAGUGCAAGAGCUUGCUUTT-3', antisense 5'-AAGCAAGCUCUUGCACUGCTT-3'.

### *Quantitative RT-PCR*

Total RNA was extracted with Trizol (Invitrogen) and cDNA was synthesized with high-efficiency reverse transcriptase Revertra Ace (Toyobo). A Biorad CFX96 PCR system was employed to perform qRT-PCR using SYBR® Premix Ex Taq™ dye (Takara).

The primer sequences used to detect the expression of Wnt target genes in HEK293T cells were as follows:

|       |                |                            |
|-------|----------------|----------------------------|
| c-Myc | Forward primer | 5'-TGCTCCATGAGGAGACA-3'    |
|       | Reverse primer | 5'-CCTCCAGCAGAAGGTGA-3'    |
| Axin2 | Forward primer | 5'-AGTGTGAGGTCCACGGAAAC-3' |
|       | Reverse primer | 5'-CTTCACACTGCGATGCATTT-3' |
| LEF1  | Forward primer | 5'-AACATGGTGGAAAACGAAGC-3' |
|       | Reverse primer | 5'-GGGTTGGCAGTGATTGTCTT-3' |
| GAPDH | Forward primer | 5'-GCACCACCAACTGCTTA-3'    |
|       | Reverse primer | 5'-AGTAGAGGCAGGGATGAT-3'   |

The primer sequences used to detect the expression of genes related to GTPase-mediated signal transduction in wild-type embryos, *net1* morphants and *net1Δ53* mutants were as follows:

|                 |                |                                |
|-----------------|----------------|--------------------------------|
| <i>Fgd4</i>     | Forward primer | 5'-GCGTGCCCAAGTTCAGTCT-3'      |
|                 | Reverse primer | 5'-CGCCTTTATCCAGTCCTCC-3'      |
| <i>plekhg5a</i> | Forward primer | 5'-AGACTCACTAAATACCCACTGCTG-3' |

|                  |                |                             |
|------------------|----------------|-----------------------------|
|                  | Reverse primer | 5'-TTCCTCCCTGTGCCTCATC-3'   |
| <i>arhgef1b</i>  | Forward primer | 5'-CCTGGAATCGGCTATGACG-3'   |
|                  | Reverse primer | 5'-TGCTCCCTGACACGGTAAT-3'   |
| <i>arhgef28</i>  | Forward primer | 5'-ATAGCACTCGCAACAAGAACA-3' |
|                  | Reverse primer | 5'-CAGCCCTTATGGACTCAC-3'    |
| <i>arhgef4</i>   | Forward primer | 5'-CCATAGAAGACTGGGAGGGT-3'  |
|                  | Reverse primer | 5'-TTGGTGGTCAAAGAGGAAGA-3'  |
| <i>rapgef3</i>   | Forward primer | 5'-AGTCAGGCAGTCGGAATGTG-3'  |
|                  | Reverse primer | 5'-TCGTCGTCTTTGGAGTCTTTT-3' |
| <i>plekhg2</i>   | Forward primer | 5'-AATAATGGGTGGGTCGCTAA-3'  |
|                  | Reverse primer | 5'-GGCTCAGACGATGGGAAAG-3'   |
| <i>cdc42ep2</i>  | Forward primer | 5'-AACGACGAAGCCGCAAAG-3'    |
|                  | Reverse primer | 5'-TGTCCAGGTAGCAGGTGAAAT-3' |
| <i>cdc42ep1a</i> | Forward primer | 5'-ACGGTCGGACTCGCCTATA-3'   |
|                  | Reverse primer | 5'-CAGCAGCCCTCTGGAAACT-3'   |
| <i>rab9b</i>     | Forward primer | 5'-CGCTTCCCCTTTGTAGTGC-3'   |
|                  | Reverse primer | 5'-TAGCCAGAACCTCCCGAAC-3'   |
| <i>rab25a</i>    | Forward primer | 5'-ACTCGCTCTGTTTCAGGTGG-3'  |
|                  | Reverse primer | 5'-TCATAGGTCAGGTGTTTGGTG-3' |
| <i>rab33a</i>    | Forward primer | 5'-CGAGGGCGAGAAAATAAAG-3'   |
|                  | Reverse primer | 5'-GACCGTTGCACTCCTGAAT-3'   |
| <i>rab8a</i>     | Forward primer | 5'-GCAATGGGTATTATGCTGGTT-3' |

|                |                |                              |
|----------------|----------------|------------------------------|
|                | Reverse primer | 5'-AGCTTCTCGCCTCTGTCTTTA-3'  |
| <i>rab25b</i>  | Forward primer | 5'-ATCGTAGTGATGCTGGTGGG-3'   |
|                | Reverse primer | 5'-CGGGTCACTTCTTTGCTGTT-3'   |
| <i>rab11a1</i> | Forward primer | 5'-ATCGGGGTGGAGTTTGC-3'      |
|                | Reverse primer | 5'-TTCATAGGTCAGATGCTTGG-3'   |
| <i>rhoub</i>   | Forward primer | 5'-AAAATATGTCCCGACAGCG-3'    |
|                | Reverse primer | 5'-AAAGCACAGCAGGAGAACG-3'    |
| $\beta$ -actin | Forward primer | 5'-ATGGATGATGAAATTGCCGCAC-3' |
|                | Reverse primer | 5'-ACCATCACCAGAGTCCATCACG-3' |

#### *Generation of net1Δ20 and net1Δ53 mutant lines using Cas9/gRNA system*

The humanized Cas9 expression vector was kindly provided by Prof. Jingwei Xiong at College of Life Sciences, Peking University. The gRNA oligonucleotide sequence was: **5'-TAATACGACTCACTATAGGGCCAGACCCTCCAGGCCTCATTCGTTTTAGAGCTAGAAATAGC-3'**, with the T7 site shown in bold, the targeting sequence underlined, and the gRNA scaffold shown in italics. The Cas9 mRNA and gRNA were synthesized *in vitro* as previously described [3]. 150 pg Cas9 mRNA and 20 pg gRNA were co-injected into one cell stage wild-type embryos. Embryos were collected to make genomic DNA for genotyping at 24 hpf. For screening of the F1 fish with mutant alleles, genomic DNA was isolated from the tail of individual fish. The genomic region surrounding gRNA targeted sequences in the *net1* locus was amplified with the forward primer (5'- TTGGCAGTTGTGCAGTTGGTA-3') and the reverse primer (5'- TTTTCAGTGCTGTCTGGATTCTC-3'). The amplified DNA

fragment was purified for enzymatic digestion with T7 endonuclease I (M0302, NEB) and subjected to Sanger sequencing. Homozygous *net1* mutants were generated by incrossing F1 fish carrying mutated genomic DNA.

### **Supplemental References**

- 1 Fukuda M, Gotoh I, Gotoh Y, Nishida E. Cytoplasmic localization of mitogen-activated protein kinase kinase directed by its NH<sub>2</sub>-terminal, leucine-rich short amino acid sequence, which acts as a nuclear export signal. *J Biol Chem* 1996; **271**:20024-20028.
- 2 Kalderon D, Roberts BL, Richardson WD, Smith AE. A short amino acid sequence able to specify nuclear location. *Cell* 1984; **39**:499-509.
- 3 Chang N, Sun C, Gao L *et al.* Genome editing with RNA-guided Cas9 nuclease in zebrafish embryos. *Cell Res* 2013; **23**:465-472.
